# Supplementary material for: Filtration artefacts in bacterial community composition can affect the outcome of dissolved organic matter biolability assays
Source: Copernicus journal article supplement (doi:10.5194/bg-15-7141-2018), 2018-11-30
Supplement: Supplementary file 1 [file bg-15-7141-2018-supplement.zip]

Archive with 3 entries (3 files):
- DOC-concentrations_DOC-d13C_DOM-Absorption.xlsx
- bg-15-7141-2018-supplement-title-page.pdf
- bg-2018-282-supplement-version5.pdf
