# Supplementary material for: Filtration artefacts in bacterial community composition can affect the outcome of dissolved organic matter biolability assays
Source: Copernicus journal article supplement (doi:10.5194/bg-15-7141-2018), 2018-11-30
Supplement: Supplementary file 1 [file bg-15-7141-2018-supplement.zip › bg-15-7141-2018-supplement-title-page.pdf]

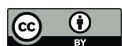

## *Supplement of*

# **Filtration artefacts in bacterial community composition can affect the outcome of dissolved organic matter biolability assays**

**Joshua F. Dean et al.**

*Correspondence to:* Joshua F. Dean ([joshua.dean@liverpool.ac.uk](mailto:joshua.dean@liverpool.ac.uk))

- [bg-15-7141-2018-supplement-title-page.pdf](#)
- [DOC-concentrations\\_DOC-d13C\\_DOM-Absorption.xlsx](#)
- [bg-2018-282-supplement-version5.pdf](#)

The copyright of individual parts of the supplement might differ from the CC BY 4.0 License.
