# Supplementary material for: Filtration artefacts in bacterial community composition can affect the outcome of dissolved organic matter biolability assays
Source: Copernicus journal article supplement (doi:10.5194/bg-15-7141-2018), 2018-11-30
Supplement: Supplementary file 1 [file bg-15-7141-2018-supplement.zip › DOC-concentrations_DOC-d13C_DOM-Absorption.xlsx]

## Sheet: DOC_d13C
Day	Treatment	DOC (mmol/L)	d13C (permil)	Abs240	Abs300	Abs440	E2E3	E4E6	SUVA254	SR
0	P2	0.984624	-27.2755	279.188	169.127	35.1972	2.91568	2.98223	248.124	0.683531
0	P2	1.03908	-27.4659	279.526	169.436	35.7594	2.89362	3.00887	248.433	0.682251
0	P2	1.1569	-27.6914	279.469	169.548	35.7032	2.88695	3.0665	248.433	0.680554
0	P2	1.15958	-27.7779	148.267	71.5471	6.38161	5.05593	7.33476	127.042	0.717561
0	P2	1.16859	-27.5809	148.07	71.2659	6.43781	5.02682	6.23952	126.732	0.715244
0	P7	1.05092	-27.7051	263.136	147.761	22.0123	3.565	3.20006	230.075	0.657805
0	P7	1.0758	-27.8252	256.445	142.588	19.6227	3.65957	4.14061	223.834	0.650945
0	P7	1.09192	-27.8974	263.136	147.367	20.9158	3.59491	4.11696	229.991	0.6463
0	P7	1.09258	-27.9668	261.843	148.576	19.3696	3.50851	7.27924	229.738	0.607653
0	P7	1.09612	-28.1041	261.28	148.295	19.3696	3.50811	7.27924	229.26	0.607561
0	UF	P7	P7	P7	P7	P7	P7	P7	P7	P7
0	UF	P7	P7	P7	P7	P7	P7	P7	P7	P7
0	UF	P7	P7	P7	P7	P7	P7	P7	P7	P7
0	UF	P7	P7	P7	P7	P7	P7	P7	P7	P7
0	UF	P7	P7	P7	P7	P7	P7	P7	P7	P7
5	P2	1.36439	-27.614	127.407	57.7436	5.53825	5.60951	3.57485	108.431	0.816965
5	P2	1.26704	-28.5371	140.03	67.6112	8.18072	4.70647	4.43703	120.519	0.835592
5	P2	1.29549	-28.5152	156.87	79.5873	10.2329	4.19666	6.23815	135.869	0.792455
5	P2	1.27369	-28.4959	139.102	65.8121	5.93184	5.11226	28.3699	119.423	0.760685
5	P2	1.25292	-28.5703	131.287	59.9927	4.27299	5.67718	-7.75478	111.945	0.731383
5	P7	1.10255	-28.6772	146.102	69.4387	5.84732	5.18548	15.1065	125.411	0.728581
5	P7	1.13066	-28.5692	149.869	72.278	7.19688	4.90732	5.77305	128.841	0.755423
5	P7	1.12956	-28.55	143.15	67.2739	5.14467	5.35376	-29.2664	122.656	0.716153
5	P7	1.11891	-28.6013	133.676	61.0611	4.35751	5.75237	-96.0574	114.054	0.730349
5	P7	1.13879	-28.5599	136.488	62.804	4.27299	5.66933	-10.3397	116.64	0.714702
5	UF	0.888882	-28.4051	139.243	65.025	5.31325	5.40566	25.3732	119.114	0.73636
5	UF	0.947582	-28.8038	132.046	59.8803	3.79511	5.91494	-4.64771	112.479	0.70706
5	UF	1.00208	-28.6475	146.383	69.3542	5.08825	5.29042	-6.64771	125.467	0.689721
5	UF	1.00938	-28.736	134.829	61.567	3.96392	5.82244	-4.20074	114.981	0.704028
5	UF	0.985862	-28.8056	139.074	64.4907	4.4418	5.58051	-5.50068	118.861	0.698736
14	P2	1.08214	-28.5676	127.632	58.531	5.22896	5.63829	5.90804	108.993	0.803999
14	P2	1.08736	-28.7029	124.427	56.2257	4.1887	6.01684	7.69187	106.098	0.765518
14	P2	1.10846	-28.6457	125.13	56.5631	4.3856	5.98788	5.57759	106.435	0.773856
14	P2	1.08332	-28.5834	124.849	56.1695	4.30108	6.02599	6.55988	106.266	0.77339
14	P2	1.10647	-28.6548	133.226	62.2418	6.04422	5.29988	5.42861	114.138	0.80929
14	P7	1.0699	-27.6549	142.026	64.5752	5.90351	5.39069	5.87975	118.861	0.783107
14	P7	1.08355	-27.7104	136.291	63.029	5.65064	5.4513	6.71295	116.387	0.780545
14	P7	1.13505	-27.5108	136.066	62.6354	5.53802	5.49872	7.66424	116.021	0.780079
14	P7	1.0868	-27.7161	135.363	62.2137	5.39754	5.53172	6.99828	115.375	0.773124
14	P7	1.05805	-27.8408	133.704	61.3422	5.11634	5.61619	10.3324	114.11	0.770681
14	UF	1.08191	-28.2311	135.335	60.9206	4.49799	5.77841	17.1528	113.857	0.741987
14	UF	1.06148	-28.4294	136.094	61.0891	4.21679	5.86758	47.3347	114.7	0.739178
14	UF	1.02959	-28.7465	134.407	60.0489	3.8794	5.96305	-27.3497	113.013	0.719759
14	UF	1.03794	-28.725	138.287	62.4949	5.25706	5.58864	6.09399	116.387	0.773772
14	UF	1.03084	-28.6215	141.548	65.0812	6.80329	5.22789	4.23815	119.395	0.822577
27	P2	1.05567	-28.0799	126.086	55.6635	3.82321	6.08582	17.4098	105.114	0.739667
27	P2	1.11881	-28.2348	132.636	61.5389	6.40971	5.15693	4.97021	111.72	0.821741
27	P2	1.15041	-27.7991	126.536	55.9726	3.96392	6.03236	13.0082	105.564	0.740182
27	P2	1.1441	-28.3335	126.395	55.5509	3.76702	6.13029	21.0123	105.17	0.738071
27	P2	1.15717	-28.3021	134.182	62.5511	6.63448	5.09223	5.06107	113.238	0.820599
27	P7	0.311131	-28.3215	139.158	64.0973	5.48183	5.45571	10.0762	117.933	0.759739
27	P7	0.341675	-28.0966	133.03	60.4144	4.75109	5.74692	12.3294	112.648	0.753931
27	P7	0.327654	-28.2808	136.122	62.4949	5.03205	5.58876	13.1065	115.487	0.755661
27	P7	0.302625	-28.3772	136.15	62.4668	5.00396	5.6121	12.8844	115.572	0.752989
27	P7	0.322476	-28.0641	133.086	60.6394	4.58228	5.74829	17.5109	112.76	0.749057
27	UF	0.925838	-29.3506	133.17	60.7237	4.52609	5.84566	13.2582	113.463	0.75736
27	UF	0.933821	-28.4751	133.62	61.0891	4.83538	5.76096	9.24915	113.829	0.764947
27	UF	0.925908	-28.2851	137.022	63.8161	6.38161	5.3162	4.17937	117.146	0.816196
27	UF	0.937719	-28.3107	135.476	62.1294	5.48183	5.63161	5.23062	115.487	0.789483
27	UF	1.03341	-28.2224	132.58	60.3301	4.4418	5.8736	16.8429	112.873	0.746847
41	P2	0.289662	-28.9518	126.564	56.7597	4.72276	5.70497	5.94825	105.845	0.766023
41	P2	0.405859	-28.0968	127.238	56.6471	4.32918	5.86333	9.89762	106.379	0.758398
41	P2	0.370404	-27.8571	134.21	63.2818	7.67475	4.81238	4.23427	113.66	0.857602
41	P2	0.328747	-28.5613	148.492	73.824	10.9639	4.18855	3.48194	126.986	0.862412
41	P2	0.293642	-28.9021	125.973	56.0569	4.1606	5.88251	13.4211	105.31	0.746494
41	P7	0.228561	-28.8952	127.829	58.5026	4.61038	5.69252	11.7743	108.993	0.757408
41	P7	0.221091	-28.6941	130.556	59.7396	4.61038	5.70913	17.487	111.355	0.753369
41	P7	0.224745	-28.8953	131.849	60.9765	5.08825	5.5885	9.23062	112.648	0.764843
41	P7	0.224826	-28.7561	125.945	57.7998	4.69467	5.60027	12.1074	107.025	0.75782
41	P7	0.2272	-28.7743	125.692	57.2376	4.61038	5.64757	8.23062	106.379	0.759785
41	UF	0.234298	-28.8419	133.423	61.4263	5.39754	5.53416	6.14197	113.941	0.787981
41	UF	0.234984	-28.7709	133.592	61.7075	5.70683	5.428	5.55963	114.166	0.800659
41	UF	0.298715	-28.2375	133.929	61.6232	5.34135	5.54913	6.84347	114.335	0.789117
41	UF	0.97656	-27.9542	136.234	63.563	6.4659	5.22815	4.34188	116.499	0.822417
41	UF	0.943525	-28.0009	134.351	61.848	5.31325	5.52865	7.05644	114.897	0.781749
